# 1 **A microRNA Signature of Metastatic Colorectal Cancer**

2 **Running title:** miRNA in metastatic colorectal cancer

3 Eirik Høyve<sup>1,2\*</sup>, Bastian Fromm<sup>1,3,\*</sup>, Paul Heinrich Michael Böttger<sup>4</sup>, Diana Domanska<sup>5</sup>, Annette Torgunrud<sup>1</sup>,  
4 Christin Lund-Andersen<sup>1,2</sup>, Torveig Weum Abrahamsen<sup>1</sup>, Åsmund Avdem Fretland<sup>2,6,7</sup>, Vegar Johansen  
5 Dagenborg<sup>1,2</sup>, Susanne Lorenz<sup>8</sup>, Bjørn Edwin<sup>6,7,2</sup>, Eivind Hovig<sup>1,9</sup>, Kjersti Flatmark<sup>10,1,2\*\*</sup>

6 <sup>1</sup> Department of Tumor Biology, Institute for Cancer Research, The Norwegian Radium Hospital, Oslo  
7 University Hospital, Oslo, Norway

8 <sup>2</sup> Institute of Clinical Medicine, Medical Faculty, University of Oslo, Oslo, Norway

9 <sup>3</sup> Science for Life Laboratory, Department of Molecular Biosciences, The Wenner-Gren Institute, Stockholm  
10 University, Stockholm, Sweden

11 <sup>4</sup> Independent researcher, Linz, Austria

12 <sup>5</sup> Department of Pathology, University of Oslo, Oslo, Norway

13 <sup>6</sup> The Intervention Centre, Rikshospitalet, Oslo University Hospital, Oslo, Norway

14 <sup>7</sup> Department of Hepato-Pancreato-Biliary Surgery, Rikshospitalet, Oslo University Hospital, Oslo, Norway

15 <sup>8</sup> Department of Core Facilities, Institute for Cancer Research, The Norwegian Radium Hospital, Oslo  
16 University Hospital, Oslo, Norway

17 <sup>9</sup> Center for Bioinformatics, Department of Informatics, University of Oslo, Oslo, Norway

18 <sup>10</sup> Department of Gastroenterological Surgery, The Norwegian Radium Hospital, Oslo University Hospital,  
19 Nydalen, Oslo, Norway

20

21 \* These authors contributed equally to this work

22 \*\* Corresponding author, email: [kjersti.flatmark@rr-research.no](mailto:kjersti.flatmark@rr-research.no)

## 23 **Abstract**

24 Although microRNAs (miRNA) are involved in all hallmarks of cancer, miRNA dysregulation in metastasis  
25 remains poorly understood and contradictory results have been published. The aim of this work was to identify  
26 miRNAs associated with metastatic progression of colorectal cancer (CRC). Novel and previously published  
27 next generation sequencing (NGS) datasets generated from 268 samples with primary (pCRC) and metastatic  
28 CRC (mCRC; liver, lung and peritoneal metastases) and tumor adjacent tissues were analyzed. Differential  
29 expression analysis was performed using a meticulous bioinformatics pipeline, including only bona fide  
30 miRNAs, utilizing miRNA-tailored quality control and processing, and applying a physiologically meaningful  
31 cut-off value (100 reads per million). The results were adjusted for host tissue background expression and  
32 samples from the different metastatic sites were independently analyzed. A metastatic signature containing five  
33 miRNAs up-regulated at multiple metastatic sites was identified (Mir-210\_3p, Mir-191\_5p, Mir-8-P1b\_3p (*mir-*  
34 *141-3p*), Mir-1307\_5p, and Mir-155\_5p) along with a number of miRNAs that were differentially expressed at  
35 individual metastatic sites. Several of these have previously been implicated in metastasis through involvement  
36 in epithelial-to-mesenchymal transition and hypoxia, while other identified miRNAs represent novel findings.  
37 The identified differentially expressed miRNAs confirm known associations and contribute novel insights into  
38 miRNA involvement in the metastatic process. The use of open science practices facilitates reproducibility, and  
39 new datasets may easily be added to the publicly available pipeline to continuously improve the knowledge in  
40 the field. The identified set of miRNAs provides a reliable starting-point for further research into the role of  
41 miRNAs in metastatic progression.

## 42 **Introduction**

43 Colorectal cancer (CRC) is a heterogeneous disease and a leading cause of cancer-related deaths worldwide<sup>1</sup>,  
44 and metastatic progression to the liver, lungs and peritoneal surface remains the primary cause of CRC-related  
45 mortality. Metastasis is a complex process where cancer cells undergo adaptation to enable survival and  
46 establishment of tumors in organs with very different microenvironments<sup>2,3</sup>. The genomic and transcriptomic  
47 changes in metastatic CRC (mCRC) remain incompletely understood, particularly in the context of organ-  
48 specific metastasis<sup>4-6</sup>.

49 MicroRNAs (miRNAs) are evolutionary ancient post-transcriptional gene regulators that are involved in  
50 numerous biological processes and are molecular players in human disease, including cancer<sup>7,8</sup>. MiRNAs can be  
51 extracted from tissues and body fluids, and because of their remarkable chemical stability and the availability of  
52 sensitive detection methods, miRNAs have been suggested as cancer biomarkers<sup>9-11</sup>. However, to date, no  
53 miRNAs have been clinically implemented as biomarkers of CRC<sup>5,12-18</sup>. In mCRC, in particular, there is little  
54 consensus regarding which miRNAs are up- and down-regulated, limiting our understanding of their role in  
55 metastatic progression<sup>5</sup>.

56 The lack of consensus likely reflects some well-known caveats related to analysis of miRNAs in human  
57 disease. Non-miRNA sequences have been incorrectly annotated as miRNA genes<sup>19</sup>, and a bioinformatics  
58 workflow specifically tailored for analysis of miRNAs in bulk tissue samples has not been available.  
59 Furthermore, differential expression analysis has been performed without ensuring the presence of  
60 physiologically relevant tissue expression levels<sup>20</sup>. Also, accounting for differences in cellular composition is  
61 important, since many miRNAs are exclusively expressed in particular cell types or at specific developmental  
62 time points<sup>21-24</sup>, likely confounding analysis of bulk tissue samples. Finally, to elucidate the role of miRNAs in  
63 mCRC, failure to consider differences related to metastatic location, and differences in normal background  
64 expression, may have contributed to inconsistent results<sup>12,25</sup>.

65 To overcome these challenges, the publicly available, manually curated miRNA gene database MirGeneDB  
66 ([mirgenedb.org](http://mirgenedb.org)), was used as miRNA reference<sup>26</sup>, and a novel bioinformatics pipeline was developed. The  
67 bioinformatics work-flow included use of the miRTrace software as a universal quality control pipeline  
68 specifically for miRNA next-generation sequencing (NGS) data<sup>27</sup> with subsequent processing using miRge3.0<sup>28</sup>.  
69 A strict cut-off of 100 reads per million (RPM) was applied as the minimum expression level for physiological

70 relevance<sup>12</sup>. Taking cell-type specific miRNA expression into account, metastatic samples from different sites  
71 were independently analyzed, which allowed correction for different background expression levels at the  
72 individual sites. Existing publicly available miRNA-sequencing (miRNA-seq) patient derived datasets,  
73 combined with novel miRNA-seq datasets from pCRC and mCRC with normal adjacent tissues, were analyzed,  
74 after quality control totaling 268 datasets. Using this unbiased analytical approach, a novel mCRC miRNA  
75 signature was identified, which partially overlaps with previous reports, but which also includes several miRNAs  
76 previously not identified in this context.

## 77 **Results**

### 78 **NGS data collection and processing**

79 New NGS datasets were successfully generated from 85 samples: pCRC (n=3), tumor adjacent colorectum (nCR;  
80 n=3), liver metastases (mLi; n=19), tumor adjacent liver (nLi; n=9), lung metastases (mLu; n=25), tumor  
81 adjacent lung (nLu; n=7), and peritoneal metastases (PM; n=20). From five studies, previously published  
82 datasets containing NGS analyses of miRNA in pCRC and mCRC were also included<sup>12,14,15,29</sup> while data from  
83 four published studies were not accessible despite repeated requests<sup>30-33</sup>. In total, 350 NGS datasets were  
84 subjected to quality assessment using the miRTrace pipeline. The majority of the new NGS datasets and datasets  
85 from three previously published studies<sup>12,15,34</sup> fulfilled the quality control criteria. Two studies were excluded,  
86 one because of low quality reads in the majority of samples<sup>29</sup>, the other because of contamination of reads from  
87 other organisms<sup>14</sup> (Supplementary file 1). After quality control, a total of 268 NGS datasets remained for further  
88 analysis, including pCRC (n=120), nCR (n=25), mLi (n=35), nLi (n=20), mLu (n=28), nLu (n=10) and PM  
89 (n=30). These datasets were then successfully processed and mapped to MirGeneDB<sup>26</sup> using miRge3.0<sup>28</sup>.

### 90 **Global miRNA expression**

91 When analyzing global miRNA expression using the dimensionality reducing algorithm uniform manifold  
92 approximation and projection for dimension reduction (UMAP), the datasets clustered according to the tissue of  
93 origin (Fig. 1). The normal tissues (nLi, nLu and nCR) formed distinct clusters reflecting the unique  
94 transcriptional profiles of these organs. nLi and nCR clustered separately from the corresponding tumor tissues,  
95 while nLu clustered close to the mLu tissue datasets. In general, the pCRC and mCRC dataset clusters were less  
96 homogeneous than the normal tissue counterparts, but with exception of the PM datasets, which exhibited  
97 considerable overlap with the other malignant datasets, the pCRC, mLi, and mLu datasets all formed distinct  
98 clusters.

### 99 **Differential miRNA expression between pCRC and nCR**

100 Thirty-two miRNAs were up-regulated and 35 miRNAs were down-regulated when comparing pCRC to nCR.  
101 Among the differentially expressed miRNAs were many well-known oncomiRs, including Mir-21\_5p, multiple  
102 MIR-17 family members, Mir-31, Mir-221 (up-regulated) and Mir-8-P1b\_3p (miR-141) (down-regulated).  
103 Several cell-type specific miRNAs were also detected at different levels in the two tissues, including higher

104 levels of Mir-17-P1a/P1b\_5p (mir-17; CD14+ monocytes) and Mir-223\_3p (dendritic cells), and lower levels of  
105 Mir-486\_5p and Mir-451\_5P (red blood cells), the Mir-143\_5p and Mir-145\_5p (mesenchymal cells), Mir-  
106 150\_5p (lymphocytes), Mir-375\_3p and Mir-192-P1\_5p (epithelial cells), and Mir-342\_3p (dendritic cells,  
107 lymphocytes and macrophages)<sup>22</sup>. For a complete overview of differentially expressed miRNAs between pCRC  
108 and nCR, see Supplementary file 3.

## 109 **Differential expression analysis identifies miRNA signature of mCRC**

110 After performing site specific differential expression analysis and correcting for background expression, a total  
111 of 26 miRNAs were identified as differentially expressed in one or more of the metastatic tissues compared to  
112 pCRC (Fig. 2 and Table 1). Two miRNAs, Mir-210\_3p and Mir-191\_5p, were up-regulated at all three  
113 metastatic sites. In addition, three miRNAs were up-regulated at two of the three sites; Mir-8-P1b\_3p in mLi and  
114 mLu, Mir-1307\_5p in mLi and PM, and Mir-155 in mLu and PM (Fig. 3). All these miRNAs were expressed  
115 well above the threshold for biological significance, with Mir-191\_5p and Mir-8-P1b\_3p being expressed at  
116 particularly high levels (>1000 RPM).

117 In addition, several miRNAs were up- or down-regulated at individual metastatic sites. In mLi, four miRNAs  
118 were identified as up-regulated, Mir-10-P1a\_5p, Mir-592\_5p, Mir-1247\_5p and Mir-425\_5p, while Mir-486\_5p  
119 was down-regulated. Of these, Mir-10-P1a\_5p was expressed at exceptionally high levels, with 97 123 RPM in  
120 pCRC and 164 925 RPM in mLi. In mLu Mir-19-P1\_3p, Mir-19-P2a/P2b\_3p, Mir-374-P1\_5p and Mir-142\_5p  
121 were up-regulated while Mir-423\_5p, Let-7-P1b\_5p, Mir-197\_3p, Mir-92-P1c\_3p, Mir-362-P2/P4\_3p and Mir-  
122 221\_3p were down-regulated. In PM Mir-506-P3\_3p, Mir-506-P4a1/P4a2/P4b\_3p, Mir-154-P9\_3p and Mir-  
123 127\_3p, Mir-154-P36\_3p were up-regulated and Mir-223\_3p were down-regulated.

## 124 **qPCR validation**

125 qPCR analysis of randomly selected mLi (n=11) and pCRC (n=11) samples not included in the previous NGS  
126 analysis replicated the findings from the NGS data, validating up-regulation of Mir-210\_3p in mLi compared to  
127 pCRC. Welch two-sided t-test on dCq values, t-statistic = -2.25, degrees of freedom = 19.95, p-value = 0.036.

## 128 **Analysis of cell-type specific miRNAs**

129 Of the 45 previously validated cell-type specific miRNAs, only 25 had a mean expression greater than 100 RPM  
130 in at least one of the tissues and formed the basis for the following analysis. The relative expression levels of

131 cell-type specific miRNAs showed clear differences between the tissues, particularly prominent for the tumor  
132 adjacent tissues (Fig. 4A). For instance, hepatocyte specific Mir-122\_5p was detected at high and moderate  
133 levels in nLi and mLi, respectively, and at extremely low levels in the other tissues. Also, Mir-143\_3p and Mir-  
134 145\_5p was detected at higher levels in nCR and nLu relative to the other datasets ( $p=4.38E-02$  and  $p=3.42E-04$ ,  
135 respectively). The epithelial cell specific Mir-8-P2a\_3p and Mir-8-P2b\_3p, were detected at higher levels in the  
136 intestinal epithelial-derived tissues compared to nLi and nLu ( $p=2.20E-16$  and  $p=2.24E-16$ , respectively). In line  
137 with these findings, principal component analysis (PCA) (Fig. 4B) showed distinct clusters for nLi and nLu,  
138 whereas nCR clustered closer to pCRC and the metastatic tissues. The correlation circle (Fig. 4C) shows the  
139 loading of the PCA, indicating the direction and relative contribution of the 15 cell-type specific miRNAs that  
140 contributed most to the clustering of each tissue.

#### 141 **Gene set enrichment (GSE) analysis**

142 RBiomirGS analysis revealed multiple GO terms and KEGG pathways that were predicted to be either more or  
143 less repressed because of differential expression of miRNAs between pCRC and mCRC. Among terms predicted  
144 to be less repressed, several were common to mLi and mLu. These included the five Molecular Function GO  
145 terms: Transcription Coregulator Activity, Transcription Coactivator Activity, Transcription Regulator Activity,  
146 mRNA Binding and Poly Purine Tract Binding. Also estimated to be less repressed were the eight Cellular  
147 Component GO terms, including Transcription Repressor Complex, Caveola, Transferase Complex, Golgi  
148 Aparatus, Glutamatergic Synapse, Catalytic Complex, Nuclear Envelope and Transcription Regulator Complex.  
149 Furthermore, 92 Biological Process GO terms, many of which are related to transcriptional activity, were also  
150 estimated to have reduced miRNA repression in both mLi and mLu. Among the KEGG pathways, only mLu had  
151 pathways predicted to be less repressed, including Long Term Potentiation, Axon Guidance, Long Term  
152 Depression, Ubiquitin Mediated Proteolysis, Neurotrophin Signaling Pathway, TGF Beta Signaling Pathway,  
153 Adherens Junction and Phosphatidylinositol Signaling System. One KEGG pathway, Systemic Lupus  
154 Erythematosus, was estimated to be more repressed in both mLi and mLu, while the Parkinsons Disease KEGG  
155 pathway was repressed only in mLu. Notably, no differentially repressed GO terms or KEGG pathways were  
156 shared between the PM datasets and the other two sites. There were also many GO terms and KEGG pathways  
157 that were differentially repressed specifically to individual sites. All results for the GSE are shown in  
158 Supplementary file 6.

## 159 Discussion

160 The initial differential expression analysis comparing pCRC and nCR revealed 68 differentially expressed  
161 miRNAs, reflecting major and genome-wide changes of malignant transformation. Among the up-regulated  
162 miRNAs, a subset representing previously reported “oncoMirs” was identified, including Mir-21, and members  
163 of the three clusters Mir-17-92, Mir-31, and Mir-221. These miRNAs have validated mRNA targets in CRC,  
164 such as phosphatase and tensin homolog (PTEN), transforming growth factor beta receptor (TGFBR), and  
165 Smad<sup>16,35,36</sup>. A number of other miRNAs previously connected to CRC were also up-regulated, such as MIR-15  
166 family member Mir-29-P2a/P2b (*miR-29b*), two MIR-96 family members, Mir-135-P3, Mir-130-P2a (*miR-*  
167 *301a*)<sup>37,38</sup>, Mir-181-P1c<sup>39</sup>, and Mir-224<sup>16,35</sup>. One up-regulated miRNA, Mir-95-P2 (*miR-421*), has not been  
168 reported for CRC previously, but its deregulation has been demonstrated in other cancers<sup>40-42</sup>. The remaining  
169 down-regulated miRNAs were all previously reported to be associated with CRC; for instance, the tumor  
170 suppressor MIR-10 family (4 genes), MIR-15, MIR-192 and MIR-194<sup>16,35</sup> have been implicated in CRC  
171 progression. The identification of miRNAs previously reported to be deregulated in CRC and associated with  
172 relevant signaling pathways provides confidence in our analytical approach.

173 Using the same analytical strategy, a metastatic signature was identified, which included five miRNAs that  
174 were differentially expressed in at least two metastatic sites compared to pCRC. Of these, Mir-210\_3p and Mir-  
175 191\_5p were up-regulated at all three metastatic sites, which would suggest a strong metastasis-related  
176 significance. Mir-210\_3p is in the literature known as the “hypoxamiR” because of its key involvement in the  
177 cellular response to hypoxia. The Mir-210\_3p promoter has a binding site for hypoxia inducible transcription  
178 factors HIF-1 $\alpha$  and HIF-2 $\alpha$ <sup>43</sup> which coordinate cellular responses to hypoxic stress, including regulation of key  
179 pathways in metastasis, such as angiogenesis, cell proliferation, differentiation and apoptosis<sup>44</sup>. Increased Mir-  
180 210\_3p expression, which was additionally validated by qPCR in a separate set of samples, therefore suggests  
181 hypoxic stress to be a common feature of CRC metastasis, irrespective of metastatic site. In contrast, the role of  
182 Mir-191\_5p in metastasis is less well established, and this miRNA is therefore an interesting candidate for  
183 further follow-up studies. Additionally, three miRNAs, Mir-8-P1b\_3p, Mir-1307\_5p, and Mir-155\_5p, were up-  
184 regulated at two of three metastatic sites. Mir-8-P1b\_3p (*miR-141*) is a member of the MIR-8 (*miR-200*) family,  
185 which is strongly involved in epithelial to mesenchymal transition (EMT) and targets transcription factors ZEB1  
186 and ZEB2, which in turn suppress E-cadherin expression<sup>45,46</sup>. In our data, Mir-8-P1b\_3p was down-regulated in  
187 pCRC relative to nCR, while up-regulated in mLi and mLu (Fig. 3). This fits well with the concept that tumors



188 undergo EMT as part of tumorigenesis at the primary site, while in the established metastasis the inverse process,  
189 mesenchymal to epithelial transition, is necessary to establish growth in the new metastatic microenvironment.  
190 Mir-155\_5p, which was preferentially expressed in mLu and PM, is reported to be specifically expressed in  
191 lymphocytes and macrophages<sup>22</sup>, possibly indicating higher abundance of these cell types in the metastases  
192 compared to pCRC. Less is known about the biological activity of Mir-1307\_5p, although reports have  
193 suggested a role in lung adenocarcinoma proliferation<sup>47</sup> and as a predictor of hepatocellular carcinoma  
194 metastasis<sup>48</sup>. The identification of this miRNA as highly expressed in mCRC points to its involvement in  
195 metastasis, and Mir-1307\_5p therefore represents another target for further studies. Several of the signature  
196 miRNAs have previously been implicated in the metastatic process, providing evidence that their observed up-  
197 regulation represents adaptations to survival metastatic site.

198 To further investigate potential biological implications of miRNA expression, GSE analyses were performed  
199 to explore predicted effects on mRNA expression based on miRNAs that were differentially expressed at the  
200 metastatic sites. Through these analyses, GO terms related to transcription were estimated to be less repressed at  
201 the metastatic sites, and KEGG pathways “Axon Guidance”, “Long-Term Potentiation” and “Long-Term  
202 Depression” were estimated to be less repressed in mLu, possibly representing adaptations to challenges in this  
203 microenvironment. However, the biology of mRNA repression by miRNAs is complex. The seed sequence of  
204 any miRNA can usually target a large number of mRNAs, and an mRNA can potentially be targeted for  
205 repression by multiple miRNAs<sup>5</sup>. The functional role of these miRNAs will therefore be dependent on the local  
206 cellular contexture, and because the net effect on mRNA expression is highly unpredictable, GSE analysis  
207 cannot replace experimental validation. Furthermore, a miRNA may potentially have abnormal expression in  
208 multiple diseases, such as Mir-21, which has been shown to be up-regulated in 29 different diseases in addition  
209 to CRC<sup>49</sup>. Therefore, the functional role of the differentially expressed miRNAs is still not clear, but this work  
210 still represents an excellent starting point for further studies, as well as a basis for interpreting the, often  
211 contradictory, existing literature.

212 In order to obtain results that are physiologically relevant, the absolute expression level of a miRNA is an  
213 important consideration. A cut-off level of 100 RPM was therefore applied as a minimum expression level to be  
214 included in these analyses<sup>20</sup>. Several of the differentially expressed miRNAs were expressed at very high  
215 absolute levels, for instance with Mir-191\_5p, Mir-8-P1b\_3p and Mir-10-P1a\_5p all being expressed at >1000  
216 RPM in both pCRC and mCRC. Expression levels of this magnitude strongly suggest that alterations in  
217 expression of these miRNAs will influence target mRNA levels. Mir-10-P1a\_5p is of particular interest, being

218 highly and differentially expressed in mLi compared to pCRC (164 925 RPM and 97 123 RPM, respectively),  
219 suggesting specific adaptations to the unique conditions of this microenvironment. Previous experimental  
220 evidence suggests that the Mir-10-P1a\_5p paralogue, Mir-10-P1b\_5p, is associated with enhanced metastatic  
221 capability by down-regulation of metastasis suppressor Hoxd10<sup>50-52</sup>. Since Mir-10-P1a\_5p and Mir-10-P1b\_5p  
222 share the same seed sequence (ACCCUGU), the range of mRNA targets and functional roles would be expected to  
223 be similar.

224 In clinical cancer studies, the most commonly available material will be bulk tissue samples, and a tumor  
225 biopsy will therefore contain a variable amount of cancer cells of epithelial origin together with a mixture of cell  
226 types from the “host tissue” (such as fibroblasts, endothelial cells, myocytes, blood cells and immune cells). The  
227 importance of keeping cell specificity in mind when interpreting miRNA expression levels is illustrated by the  
228 high levels of hepatocyte specific Mir-122\_5p in liver metastases compared to pCRC, which is likely due to the  
229 presence of hepatocytes in the metastatic tissues, and do not indicate that this is a metastasis biomarker.  
230 Similarly, Mir-143\_3p/Mir-145\_5p were previously suggested to be tumor suppressors due to apparent “down-  
231 regulation” in pCRC relative to nCR<sup>53</sup>. In our datasets, both miRNAs were detected at much lower levels in  
232 pCRC relative to nCR, but since these miRNAs are exclusively expressed in mesenchymal cells, the low  
233 expression in pCRC can only be explained by mesenchymal cells being less frequently present in the colorectal  
234 tumors than in the normal colorectal wall<sup>54,55</sup>. Expression of known cell-type specific miRNAs could also inform  
235 on the relative composition of cell types in the different tissues, and as expected, the three tumor adjacent tissues  
236 analyzed clustered separately and had distinct miRNA expression patterns. For instance, the epithelial specific  
237 miRNAs, such as Mir-8-P2a\_3p (miR-200b) and Mir-8-P2b\_3p (miR-200c), had similar levels in the malignant  
238 tissues, which is consistent with the intestinal epithelial origin of the cancer cells. This means that considering  
239 background expression was a necessary step to ensure that cell composition effects would not confound the  
240 differential expression analysis, and failure to do so would likely have led to incorrect identification of miRNAs  
241 not associated with metastasis. Taken together, when analyzing bulk tissue samples, it is therefore necessary to  
242 consider the composition of the “host tissue”, which in this study was handled by defining and correcting for  
243 background expression and by analyzing tumor samples from different metastatic sites as separate entities.

244 In addition to applying a 100 RPM cut-off level, correcting for background expression, and analyzing  
245 metastatic locations as separate entities, a number of other methodological improvements were implemented in  
246 this work. A systematic effort was made to ensure the quality of the analyses and making the data and the

247 analytical pipeline transparent and available to other researchers in the interest of reproducibility. A novel  
248 quality assessment step was introduced in the analysis, using the recently developed miRTrace algorithm,  
249 resulting in the exclusion of two previous studies<sup>14,29</sup>. Furthermore, our recently established database  
250 MirGeneDB, containing only *bona fide* miRNA genes, was used as a reference for mapping miRNA reads to the  
251 human genome, representing a further level of precision compared to the previously more commonly used  
252 repository, miRBase<sup>56</sup>. Regretfully, miRBase has been shown to contain a proportion of incorrect miRNA  
253 annotations<sup>19</sup>, and including such sequences in the analyses could potentially lead to weakening the power of  
254 statistical analyses and result in misleading conclusions. Furthermore, to facilitate reproducibility, a common set  
255 of bioinformatics tools were used, and raw NGS datasets from all studies were run through an identical pipeline,  
256 from postprocessing and read alignment to miRNA gene counting, using the latest version of miRge<sup>28</sup>, a  
257 bioinformatics pipeline specifically developed with miRNAs in mind. Combining all these measures and  
258 specialized tools, the resulting set of differentially expressed miRNAs between pCRC and mCRC therefore  
259 highly likely represents a reliable mCRC signature.

260 In summary, this work represents the most comprehensive attempt to characterize miRNA expression in  
261 mCRC. An unbiased, stringent and transparent bioinformatics approach was developed and applied to a large  
262 compilation of new and previously published NGS datasets to identify miRNAs associated with metastatic  
263 progression in CRC. Comparison of pCRC and nCR replicated many previous findings of up- and down-  
264 regulation of well-known oncomiRs and tumor-suppressor miRNAs, supporting the analytical strategy.  
265 Correction for background expression was performed, and tumor samples from different metastatic sites were  
266 analyzed as separate entities using a 100 RPM expression cut-off level to ensure biological relevance. A  
267 metastatic signature containing five miRNAs that were up-regulated at multiple metastatic sites was identified  
268 along with a number of miRNAs differentially expressed at individual metastatic sites. Many of these miRNAs  
269 have previously been implicated as key players in the metastatic process, while for others, the involvement in  
270 tumor cell adaptations at the distant site represent novel findings. The use of open science practices and the  
271 biological relevance of the findings lend confidence in the resulting mCRC signature, which provides a starting-  
272 point for further elucidation of the role of miRNAs in metastatic progression. The pipeline developed for this  
273 analysis is freely available to other researchers to expand on the results presented in this work, as well for  
274 exploring other cancer entities and disease settings. This work could therefore represent a first step to generate a  
275 miRNA tissue expression “atlas” for researchers interested in miRNA biomarkers, for instance to identify  
276 miRNAs that are specifically deregulated in a disease of interest.

## 277 **Materials and Methods**

### 278 **Patient samples**

279 Tissue samples were obtained from study specific biobanks: pCRC and nCR samples were from the LARC-EX  
280 study (NCT02113384); mLi and nLi samples from the OSLO-COMET trial (NCT01516710); mLu and nLu  
281 samples from our lung metastasis biobank (S-06402b) and PM samples from the Peritoneal Surface  
282 Malignancies biobank (NCT02073500). The studies were approved by the Regional Ethics Committee of South-  
283 East Norway, and patients were included following written informed consent. Patient samples were collected at  
284 the time of surgery and were snap frozen in liquid nitrogen at the time of collection and stored at -80°C. Samples  
285 were prepared and processed as described in<sup>57</sup>.

### 286 **RNA extraction and NGS**

287 RNA was extracted using Qiagen Allprep DNA/RNA/miRNA universal kit, which simultaneously isolates  
288 genomic DNA and total RNA. RNA concentration was evaluated using a NanoDrop spectrophotometer  
289 (ThermoFisher, Waltham, Massachusetts, USA) and RNA integrity was evaluated using the Bioanalyzer RNA  
290 6000 Nano kit (Agilent Technologies, Santa Clara, California, USA). MiRNA NGS libraries were then prepared  
291 using TruSeq Small RNA Library protocol and sequenced using HiSeq 2500 High Throughput Sequencer (all  
292 from Illumina, San Diego, California, USA).

### 293 **Identification of published NGS datasets**

294 A literature search was conducted for the terms “microRNA + CRC + next generation sequencing” in different  
295 variations, and reviews were studied<sup>16,35</sup>. Publicly available datasets were downloaded from European Genome-  
296 phenome Archive (EGA), the Sequence Read Archive (SRA) and the Gene Expression Omnibus (GEO)<sup>12–15,34</sup>.

### 297 **Data processing, read alignment and gene counting**

298 All datasets were processed using the same pipeline. miRTrace<sup>27</sup> was used for preprocessing and quality control  
299 (QC) of raw data (FASTQ files). Briefly, low-quality reads, defined as reads where less than 50% of nucleotides  
300 had a Phread quality score greater than 20 were discarded. 3p adapter sequences were trimmed, and reads made  
301 up of repetitive elements and reads shorter than 18nt were removed. After miRTrace QC, samples were excluded  
302 if < 25% of reads were between 20 and 25 nt, if > 75% of reads were discarded, or if < 10% of reads were

303 identified as miRNA. If > 50% of the datasets in a study failed the QC criteria, or if significant contamination  
304 was detected, it was excluded. After QC, raw data processing, read alignment and gene counting was performed  
305 using miRge3.0<sup>28</sup>, with MirGeneDB2.0<sup>26</sup> as reference. To account for cross mapping of miRNA genes, miRge3.0  
306 merges miRNA genes with very similar sequences into one annotation, reducing 537 human miRNA annotations  
307 in MirGeneDB2.0 to a total of 389 unique annotations.

### 308 **Analysis of global miRNA expression**

309 For data visualization of global miRNA expression, read counts were normalized using the variance Stabilizing  
310 Transformation() (VST) function from the DESeq2 package<sup>58</sup>. UMAP was used to visualize the similarity of  
311 datasets on the global miRNA expression level. The UMAP algorithm reduces the 389 dimensions of unique  
312 miRNA genes into two dimensions for visualization<sup>59</sup>. The umap R package was used, and datasets were  
313 annotated by tissue.

### 314 **Differential expression analysis**

315 The differential expression analysis can be viewed in the supplementary R-markdown file, (Supplementary file  
316 3).

317 Differential expression analysis was performed using DESeq2 (version 1.26)<sup>58</sup>, which estimates LFC and its  
318 standard error (SE), using raw, non-normalized read counts as input. Hypothesis testing was performed by a  
319 Wald test against the null hypothesis  $LFC = 0$ , followed by the Benjamini-Hochberg procedure to correct for  
320 multiple hypothesis testing, applying a false discovery rate (FDR) threshold of  $< 0.05$ . The LFC shrinkage  
321 function in DESeq2, `lfcShrink()`, was enabled, to shrink fold changes for miRNAs with higher variance.  
322 Differentially expressed miRNAs were filtered for relevance by requiring an  $LFC > 0.58$  or  $LFC < -0.58$ , and  
323 also requiring that at least one of the compared tissues had a mean expression  $> 100$  RPM, a level previously  
324 suggested as minimal cut-off for physiological activity<sup>20</sup>. MiRNAs known to be cell-type specific<sup>22</sup> were also  
325 labelled for each miRNA. Information regarding normal tissue background expression levels was obtained by  
326 analyzing differential expression between nCR versus nLi and nLu datasets, and pCRC versus nLi and nLu  
327 datasets. Then, in the mCRC versus pCRC differential expression analysis, miRNAs differentially expressed in  
328 the same direction in the corresponding normal tissue were not considered differentially expressed in the  
329 respective metastatic site. For the PM tissue datasets, where no tumor adjacent tissue was available, the union of  
330 nLi and nLu background expression was used.

### 331 **qPCR validation**

332 Eleven additional randomly chosen mLi and 11 pCRC tissue samples were selected for qPCR validation of  
333 increased expression of Mir-210\_3p in mLi compared to pCRC. Synthetic RNA Spike-Ins UniSp2, UniSp4 and  
334 UniSp5 (Qiagen, Düsseldorf, Germany Cat. No. 339390) were added pre-isolation. RT-PCR was done with  
335 miRCURY LNA RT Kit (Qiagen Cat. No. 339340), adding UniSp6 and cel-miR-39-3p RNA Spike-Ins (Qiagen  
336 Cat. No 339390). qPCR was done using Qiagen miRCURY SYBR Green Kit (Qiagen Cat. No. 339345) and  
337 miRCURY LNA miRNA PCR Assays (Qiagen Cat. No. 339306). Mir-103 (Qiagen primer Cat. No.  
338 YP00204306) was used as reference miRNA, while the Mir-210\_3p primer was Qiagen Cat. No. YP00204333.  
339 Two PCR replicates were run per primer assay. Mir-210\_3p Cq values were normalized to the reference miRNA,  
340 to obtain the dCq value. Welch two-sided t-test was used to compare the dCq values, to test if the expression  
341 levels were different between mLi and pCRC. (Supplementary file 5).

### 342 **Analysis of cell-type specific miRNAs**

343 Two analyses were performed to assess differences in expression levels of 45 previously validated cell-type  
344 specific miRNAs<sup>22</sup>, and thereby infer differences in cell composition in the tissues. A heatmap using z-scores of  
345 RPM values per miRNA was made to illustrate the relative expression of each miRNA in the tissues (Fig. 4A).  
346 Principle component analysis (PCA) plots were made with the FactoMineR PCA() function to illustrate which  
347 miRNAs were more or less prevalent in each tissue. Welch two-sided t-test comparing mean VST values  
348 between two groups of tissues was done to assess if the observed differences in cell-type specific miRNA levels  
349 were statistically significant (Supplementary file 4).

### 350 **Gene set enrichment analysis**

351 Gene set enrichment analysis (GSEA) was performed using RBiomirGS<sup>60</sup> on GO Molecular Function, Cellular  
352 Component and Biological Process, and KEGG pathways, downloaded from [https://www.gsea-](https://www.gsea-msigdb.org/gsea/msigdb/collections.jsp)  
353 [msigdb.org/gsea/msigdb/collections.jsp](https://www.gsea-msigdb.org/gsea/msigdb/collections.jsp). miRNA to mRNA predicted interactions were combined with data from  
354 the miRNA differential expression analysis (DESeq2 estimated LFC and FDR values for each mCRC site versus  
355 pCRC). The input values to RBiomirGS were corrected for normal background expression, reducing LFC  
356 towards 0 and increasing FDR towards 1, depending on the magnitude of the normal background. All miRNAs  
357 were then given an  $S_{miRNA}$  score  $-\log_{10} p\text{-value} * \text{sign}(\log_2 FC)$ , and for each mRNA, a  $S_{mRNA}$  score was  
358 calculated by summing up the  $S_{miRNA}$  scores of all the predicted miRNA to mRNA interactions. The  $S_{mRNA}$

359 scores were then used to perform logistic regression, which provides likelihoods of gene sets being more or less  
360 suppressed due to differential expression of miRNAs.

361 **Acknowledgements**

362 The authors thank Michael Hackenberg for help with data acquisition and Marc Halushka for discussions.

363 This work was supported by the South-Eastern Norway Regional Health Authority [grant numbers 2014041 to  
364 KF, 2018014 to EH], the Norwegian Cancer Society [grant number 4499184 to CLA] and the Research Council  
365 of Norway [grant number 218325].

366 **Competing interests**

367 The authors have declared no competing interests.



## 368 **References**

- 369 1 Ferlay J *et al.* Cancer incidence and mortality worldwide: sources, methods and major patterns in  
370 GLOBOCAN 2012. *Int J Cancer* 2015; **136**: E359–86.
- 371 2 Nguyen DX, Bos PD, Massagué J. Metastasis: from dissemination to organ-specific colonization. *Nat Rev*  
372 *Cancer* 2009; **9**: 274–284.
- 373 3 Riihimäki M, Hemminki A, Sundquist J, Hemminki K. Patterns of metastasis in colon and rectal cancer.  
374 *Sci Rep* 2016; **6**: 29765.
- 375 4 Massague J, Obenauf AC. Metastatic colonization by circulating tumour cells. *Nature* 2016; **529**: 298–306.
- 376 5 Flatmark K, Høye E, Fromm B. microRNAs as cancer biomarkers. *Scandinavian Journal of Clinical and*  
377 *Laboratory Investigation*. 2016; **76**: S80–S83.
- 378 6 Arnold M, Sierra MS, Laversanne M, Soerjomataram I, Jemal A, Bray F. Global patterns and trends in  
379 colorectal cancer incidence and mortality. *Gut* 2017; **66**: 683–691.
- 380 7 Bartel DP. Metazoan MicroRNAs. *Cell* 2018; **173**: 20–51.
- 381 8 Dalmay T, Edwards DR. MicroRNAs and the hallmarks of cancer. *Oncogene* 2006; **25**: 6170–6175.
- 382 9 Jung M *et al.* Robust microRNA stability in degraded RNA preparations from human tissue and cell  
383 samples. *Clin Chem* 2010; **56**: 998–1006.
- 384 10 Volinia S *et al.* A microRNA expression signature of human solid tumors defines cancer gene targets. *Proc*  
385 *Natl Acad Sci U S A* 2006; **103**: 2257–2261.
- 386 11 Baffa R *et al.* MicroRNA expression profiling of human metastatic cancers identifies cancer gene targets. *J*  
387 *Pathol* 2009; **219**: 214–221.
- 388 12 Neerincx M *et al.* MiR expression profiles of paired primary colorectal cancer and metastases by next-  
389 generation sequencing. *Oncogenesis* 2015; **4**: e170.
- 390 13 Röhr C *et al.* High-throughput miRNA and mRNA sequencing of paired colorectal normal, tumor and  
391 metastasis tissues and bioinformatic modeling of miRNA-1 therapeutic applications. *PLoS One* 2013; **8**:  
392 e67461.
- 393 14 Goossens-Beumer IJ *et al.* MicroRNA classifier and nomogram for metastasis prediction in colon cancer.  
394 *Cancer Epidemiol Biomarkers Prev* 2015; **24**: 187–197.
- 395 15 Schee K *et al.* Deep Sequencing the MicroRNA Transcriptome in Colorectal Cancer. *PLoS ONE*. 2013; **8**:  
396 e66165.
- 397 16 Cekaite L, Eide PW, Lind GE, Skotheim RI, Lothe RA. MicroRNAs as growth regulators, their function  
398 and biomarker status in colorectal cancer. *Oncotarget* 2016; **7**: 6476–6505.
- 399 17 To KK, Tong CW, Wu M, Cho WC. MicroRNAs in the prognosis and therapy of colorectal cancer: From  
400 bench to bedside. *World J Gastroenterol* 2018; **24**: 2949–2973.
- 401 18 Git A *et al.* Systematic comparison of microarray profiling, real-time PCR, and next-generation sequencing  
402 technologies for measuring differential microRNA expression. *RNA* 2010; **16**: 991–1006.
- 403 19 Fromm B *et al.* A Uniform System for the Annotation of Vertebrate microRNA Genes and the Evolution of  
404 the Human microRNAome. *Annu Rev Genet* 2015; **49**: 213–242.
- 405 20 Mullokandov G *et al.* High-throughput assessment of microRNA activity and function using microRNA  
406 sensor and decoy libraries. *Nat Methods* 2012; **9**: 840–846.

- 407 21 Witwer KW, Halushka MK. Toward the promise of microRNAs – Enhancing reproducibility and rigor in  
408 microRNA research. *RNA Biol* 2016; **13**: 1103–1116.
- 409 22 McCall MN *et al.* Toward the human cellular microRNAome. *Genome Res* 2017; **27**: 1769–1781.
- 410 23 Rie D de *et al.* An integrated expression atlas of miRNAs and their promoters in human and mouse. *Nat*  
411 *Biotechnol* 2017. doi:10.1038/nbt.3947.
- 412 24 Juzenas S *et al.* A comprehensive, cell specific microRNA catalogue of human peripheral blood. *Nucleic*  
413 *Acids Research*. 2017; **45**: 9290–9301.
- 414 25 Mudduluru G *et al.* A Systematic Approach to Defining the microRNA Landscape in Metastasis. *Cancer*  
415 *Res* 2015; **75**: 3010–3019.
- 416 26 Fromm B *et al.* MirGeneDB 2.0: the metazoan microRNA complement. *Nucleic Acids Res* 2020.  
417 doi:10.1093/nar/gkz885.
- 418 27 Kang W, Eldfjell Y, Fromm B, Estivill X, Biryukova I, Friedländer MR. miRTrace reveals the organismal  
419 origins of microRNA sequencing data. *Genome Biol* 2018; **19**: 213.
- 420 28 Patil AH, Halushka MK. miRge3.0: a comprehensive microRNA and tRF sequencing analysis pipeline.  
421 Cold Spring Harbor Laboratory. 2021; : 2021.01.18.427129.
- 422 29 Rohr C *et al.* High-throughput miRNA and mRNA sequencing of paired colorectal normal, tumor and  
423 metastasis tissues and bioinformatic modeling of miRNA-1 therapeutic applications. *PLoS One* 2013; **8**:  
424 e67461.
- 425 30 Sun Y, Wang L, Guo S-C, Wu X-B, Xu X-H. High-throughput sequencing to identify miRNA biomarkers  
426 in colorectal cancer patients. *Oncology Letters*. 2014; **8**: 711–713.
- 427 31 Sun G, Cheng Y-W, Lai L, Huang T-C, Wang J, Wu X *et al.* Signature miRNAs in colorectal cancers were  
428 revealed using a bias reduction small RNA deep sequencing protocol. *Oncotarget* 2016; **7**: 3857–3872.
- 429 32 Liang G *et al.* Deep sequencing reveals complex mechanisms of microRNA deregulation in colorectal  
430 cancer. *Int J Oncol* 2014; **45**: 603–610.
- 431 33 Hamfjord J *et al.* Differential expression of miRNAs in colorectal cancer: comparison of paired tumor  
432 tissue and adjacent normal mucosa using high-throughput sequencing. *PLoS One* 2012; **7**: e34150.
- 433 34 Selitsky SR *et al.* Transcriptomic Analysis of Chronic Hepatitis B and C and Liver Cancer Reveals  
434 MicroRNA-Mediated Control of Cholesterol Synthesis Programs. *mBio*. 2015; **6**. doi:10.1128/mbio.01500-  
435 15.
- 436 35 Strubberg AM, Madison BB. MicroRNAs in the etiology of colorectal cancer: pathways and clinical  
437 implications. *Dis Model Mech* 2017; **10**: 197–214.
- 438 36 Schee K, Boye K, Abrahamsen TW, Fodstad O, Flatmark K. Clinical relevance of microRNA miR-21,  
439 miR-31, miR-92a, miR-101, miR-106a and miR-145 in colorectal cancer. *BMC Cancer* 2012; **12**: 505.
- 440 37 Zhang W *et al.* MicroRNA-301a promotes migration and invasion by targeting TGFBR2 in human  
441 colorectal cancer. *J Exp Clin Cancer Res* 2014; **33**: 113.
- 442 38 Ma X *et al.* Modulation of tumorigenesis by the pro-inflammatory microRNA miR-301a in mouse models  
443 of lung cancer and colorectal cancer. *Cell Discov* 2015; **1**: 15005.
- 444 39 Guo X *et al.* miR-181d and c-myc-mediated inhibition of CRY2 and FBXL3 reprograms metabolism in  
445 colorectal cancer. *Cell Death Dis* 2017; **8**: e2958.
- 446 40 Scaravilli M *et al.* MiR-1247-5p is overexpressed in castration resistant prostate cancer and targets  
447 MYCBP2. *The Prostate*. 2015; **75**: 798–805.

- 448 41 Chen L, Tang Y, Wang J, Yan Z, Xu R. miR-421 induces cell proliferation and apoptosis resistance in  
449 human nasopharyngeal carcinoma via downregulation of FOXO4. *Biochem Biophys Res Commun* 2013;  
450 **435**: 745–750.
- 451 42 Zhao J *et al.* MicroRNA-7: a promising new target in cancer therapy. *Cancer Cell Int* 2015; **15**: 103.
- 452 43 Chan YC, Banerjee J, Choi SY, Sen CK. miR-210: the master hypoxamir. *Microcirculation* 2012; **19**: 215–  
453 223.
- 454 44 Rankin EB, Giaccia AJ. Hypoxic control of metastasis. *Science* 2016; **352**: 175–180.
- 455 45 Pencheva N, Tavazoie SF. Control of metastatic progression by microRNA regulatory networks. *Nat Cell*  
456 *Biol* 2013; **15**: 546–554.
- 457 46 Gregory PA *et al.* The miR-200 family and miR-205 regulate epithelial to mesenchymal transition by  
458 targeting ZEB1 and SIP1. *Nat Cell Biol* 2008; **10**: 593–601.
- 459 47 Du X *et al.* MiR-1307-5p targeting TRAF3 upregulates the MAPK/NF- $\kappa$ B pathway and promotes lung  
460 adenocarcinoma proliferation. *Cancer Cell Int* 2020; **20**: 502.
- 461 48 Eun JW *et al.* Circulating Exosomal MicroRNA-1307-5p as a Predictor for Metastasis in Patients with  
462 Hepatocellular Carcinoma. *Cancers* 2020; **12**. doi:10.3390/cancers12123819.
- 463 49 Jenike AE, Halushka MK. miR-21: a non-specific biomarker of all maladies. *Biomark Res* 2021; **9**: 18.
- 464 50 Ma L, Reinhardt F, Pan E, Soutschek J, Bhat B, Marcusson EG *et al.* Therapeutic silencing of miR-10b  
465 inhibits metastasis in a mouse mammary tumor model. *Nat Biotechnol* 2010; **28**: 341–347.
- 466 51 Ma L, Teruya-Feldstein J, Weinberg RA. Tumour invasion and metastasis initiated by microRNA-10b in  
467 breast cancer. *Nature* 2007; **449**: 682–688.
- 468 52 Wang Y, Li Z, Zhao X, Zuo X, Peng Z. miR-10b promotes invasion by targeting HOXD10 in colorectal  
469 cancer. *Oncol Lett* 2016; **12**: 488–494.
- 470 53 Michael MZ, O' Connor SM, van Holst Pellekaan NG, Young GP, James RJ. Reduced accumulation of  
471 specific microRNAs in colorectal neoplasia. *Mol Cancer Res* 2003; **1**: 882–891.
- 472 54 Chivukula RR *et al.* An essential mesenchymal function for miR-143/145 in intestinal epithelial  
473 regeneration. *Cell* 2014; **157**: 1104–1116.
- 474 55 Kent OA, McCall MN, Cornish TC, Halushka MK. Lessons from miR-143/145: the importance of cell-  
475 type localization of miRNAs. *Nucleic Acids Res* 2014; **42**: 7528–7538.
- 476 56 Griffiths-Jones S, Grocock RJ, van Dongen S, Bateman A, Enright AJ. miRBase: microRNA sequences,  
477 targets and gene nomenclature. *Nucleic Acids Res* 2006; **34**: D140–4.
- 478 57 Østrup O *et al.* Molecular signatures reflecting microenvironmental metabolism and chemotherapy-induced  
479 immunogenic cell death in colorectal liver metastases. *Oncotarget*. 2017; **8**.  
480 doi:10.18632/oncotarget.19350.
- 481 58 Love MI, Huber W, Anders S. Moderated estimation of fold change and dispersion for RNA-seq data with  
482 DESeq2. *Genome Biology*. 2014; **15**. doi:10.1186/s13059-014-0550-8.
- 483 59 McInnes L, Healy J, Melville J. UMAP: Uniform Manifold Approximation and Projection for Dimension  
484 Reduction. arXiv [stat.ML]. 2018. <http://arxiv.org/abs/1802.03426>.
- 485 60 Zhang J, Storey KB. RBiomirGS: an all-in-one miRNA gene set analysis solution featuring target mRNA  
486 mapping and expression profile integration. *PeerJ* 2018; **6**: e4262.

487 **Figure legends**

488 **Fig. 1 Global miRNA expression according to tissue of origin**

489 UMAP cluster plot based on global miRNA expression, normalized by VST, from the DESeq2 bioconductor  
490 package, annotated by tissue of origin.

491 Uniform approximation and projection for dimension reduction (UMAP); varianceStabilizingTransformation  
492 (VST); primary colorectal cancer (pCRC); normal colorectal tissue (nCR); CRC liver metastasis (mLi); normal  
493 adjacent liver tissue (nLi); CRC lung metastasis (mLu); normal adjacent lung tissue (nLu); CRC peritoneal  
494 metastasis (PM).

495

496 **Fig. 2 Differential expression analysis identifies miRNAs associated with metastatic**  
497 **colorectal cancer**

498 **a** Volcano plots showing differentially expressed miRNAs in mLi, mLu and PM compared to pCRC. The  
499 horizontal axis shows LFC relative to pCRC, while the vertical axis shows  $-\log_{10}$  FDR. The identified miRNAs  
500 were differentially expressed between pCRC and mCRC, with expression levels greater than 100 RPM in one of  
501 the tissues, and results were corrected for tumor adjacent background expression. **b** Bar plots of LFC of  
502 differentially expressed miRNAs in pCRC compared to the individual metastatic sites.

503 Log<sub>2</sub> fold change (LFC); false discovery rate (FDR); reads per million (RPM); primary colorectal cancer  
504 (pCRC); normal colorectal tissue (nCR); CRC liver metastasis (mLi); normal adjacent liver tissue (nLi); CRC  
505 lung metastasis (mLu); normal adjacent lung tissue (nLu); CRC peritoneal metastasis (PM).

506 **Fig. 3 Differential expression analysis identifies a five-gene miRNA signature up-**  
507 **regulated at multiple metastatic sites**

508 **a** Bar plots showing LFC of the five signature miRNAs that were differentially expressed between pCRC and at  
509 least two mCRC sites. Mir-210\_3p and Mir-191\_5p were up-regulated at all three metastatic sites, while, Mir-8-  
510 P1b\_3p was up-regulated in mLi and mLu, Mir-1307\_5p in mLi and PM, and Mir-155 in mLu and PM, after

511 correcting for multiple hypothesis testing. Error bars represent 95% confidence intervals from DESeq2 estimated  
512 SE of the LFC. **b** Scatter plots of Log10 RPM in each tissue.

513 Log2 fold change (LFC); reads per million (RPM); standard error (SE) primary colorectal cancer (pCRC);  
514 normal colorectal tissue (nCR); CRC liver metastasis (mLi); normal adjacent liver tissue (nLi); CRC lung  
515 metastasis (mLu); normal adjacent lung tissue (nLu); CRC peritoneal metastasis (PM).

516 **Fig. 4 Cell-type specific miRNAs provide insight into the cellular composition of tissues**

517 **a** Heatmap illustrating the expression of 25 cell-specific miRNAs for each tissue that had mean expression > 100  
518 RPM in at least one tissue. The color scale indicates the z-score of RPM for each miRNA. **b** PCA plot based on  
519 analysis of 25 cell-specific miRNA with expression > 100 reads per million, VST normalized, colored by tissue.  
520 Transparent points are individual samples, solid points represent the statistical mean and shaded ellipses is 95%  
521 confidence of the mean of each tissue. **c** The correlation circle shows PCA loadings, which are the direction and  
522 relative contribution the top 15 cell-type specific miRNAs had on clustering of each tissue.

523 Reads per million (RPM); principal component analysis (PCA); varianceStabilizingTransformation (VST);  
524 primary colorectal cancer (pCRC); normal colorectal tissue (nCR); CRC liver metastasis (mLi); normal adjacent  
525 liver tissue (nLi); CRC lung metastasis (mLu); normal adjacent lung tissue (nLu); CRC peritoneal metastasis  
526 (PM).

527 **Table 1 Differentially expressed miRNAs in mCRC compared to pCRC according to**  
528 **metastatic site**

529 Reads per million (RPM); log 2 fold change (LFC) estimated using DESeq2; standard error (SE); primary  
530 colorectal cancer (pCRC); normal colorectal tissue (nCR); CRC liver metastasis (mLi); normal adjacent liver  
531 tissue (nLi); CRC lung metastasis (mLu); normal adjacent lung tissue (nLu); CRC peritoneal metastasis (PM);  
532 false discovery rate (FDR).

533 **Availability**

534 Data from current and previous studies can be found at EGA accession number EGAS00001001127 (14), GEO  
535 accession numbers: GSE57381 (31), GSE46622 (15) and GSE63119 (16), and SRA accession PRJNA397121  
536 for datasets prepared in this study and (17). Bioinformatics pipeline can be found at  
537 ([https://github.com/eirikhoye/mirna\\_pipeline](https://github.com/eirikhoye/mirna_pipeline))

538 **Supplementary material**

539 Supplementary file 1: miRTrace QC reports (.html)

540 Supplementary file 2: miRge3.0 count matrix and sample metadata (.csv)

541 Supplementary file 3: R-markdown: DESeq2 differential expression analysis (.html)

542 Supplementary file 4: R-markdown: code for figures (.html)

543 Supplementary file 5: R-markdown qPCR analysis (.html)

544 Supplementary file 6: R-markdown GSE results (.html)

Fig 1

UMAP2

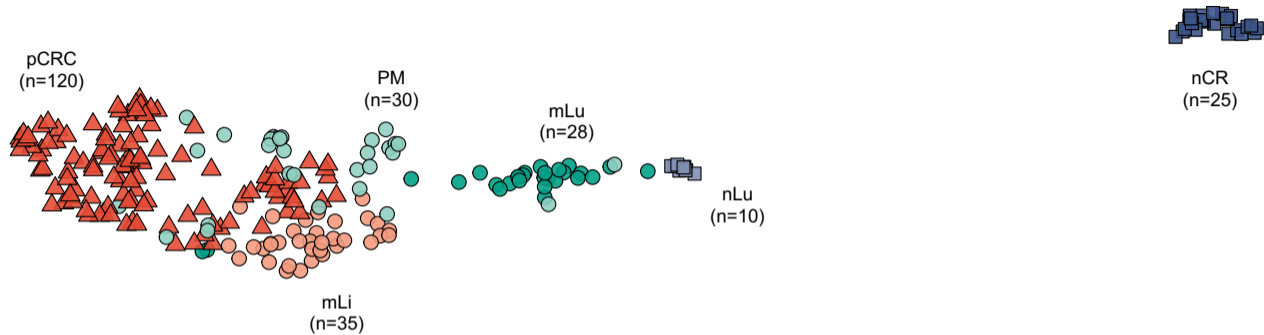

UMAP1

**Fig 2****a**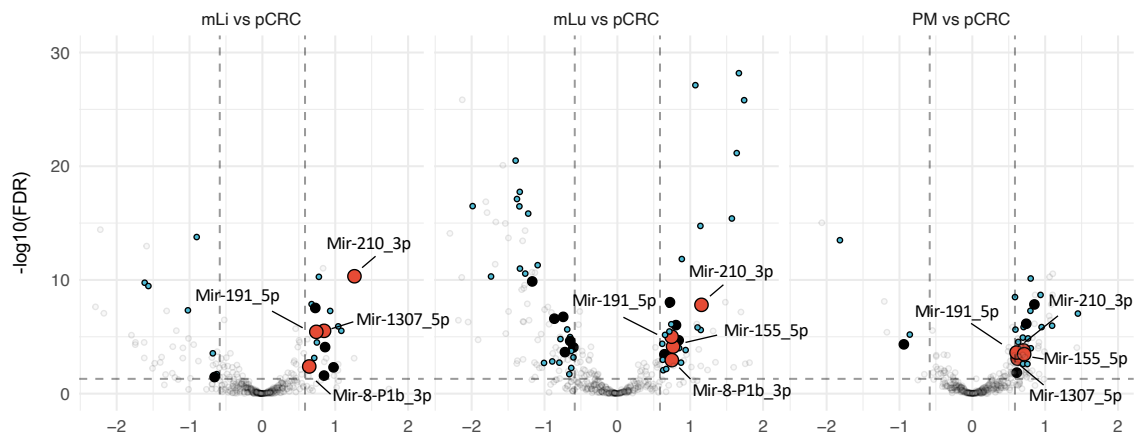**b**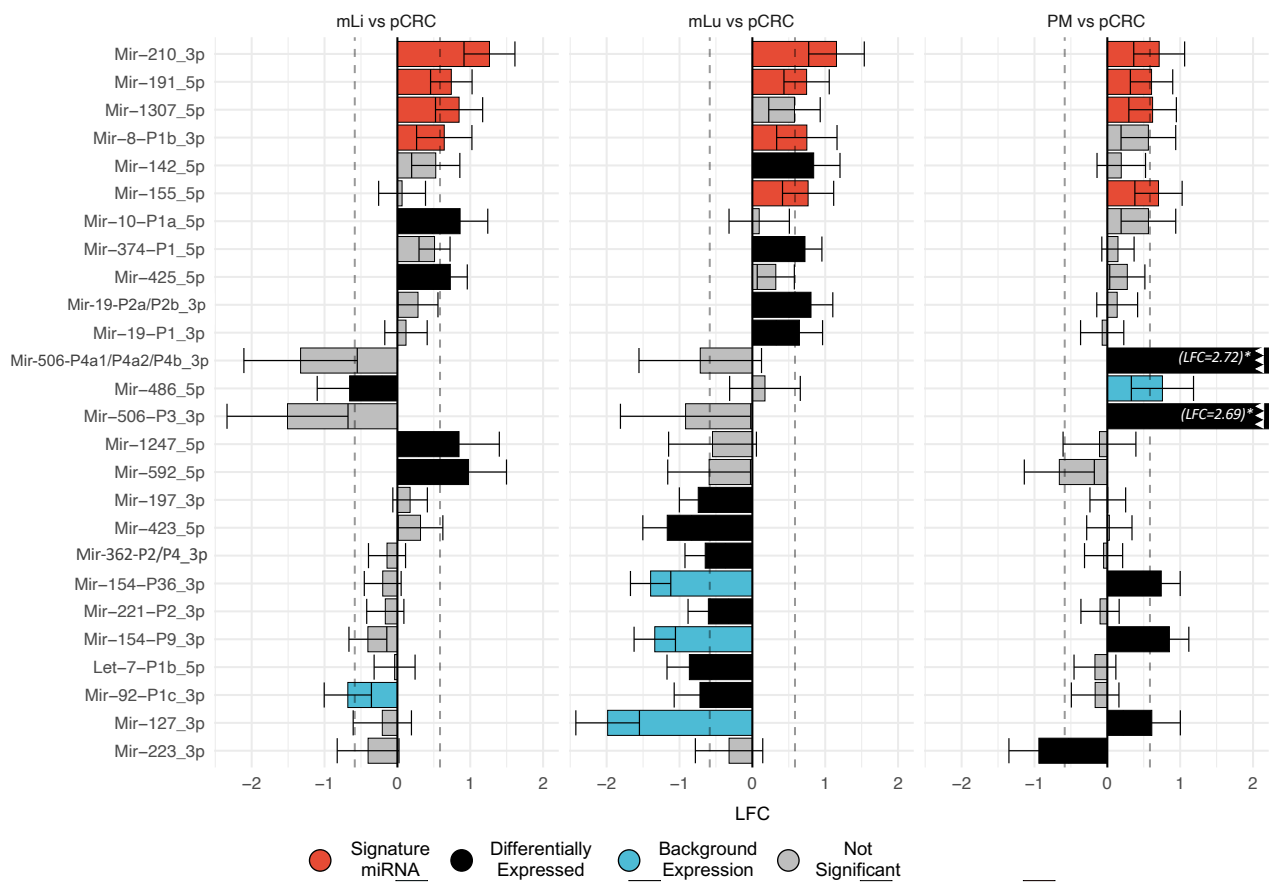



**Fig 3**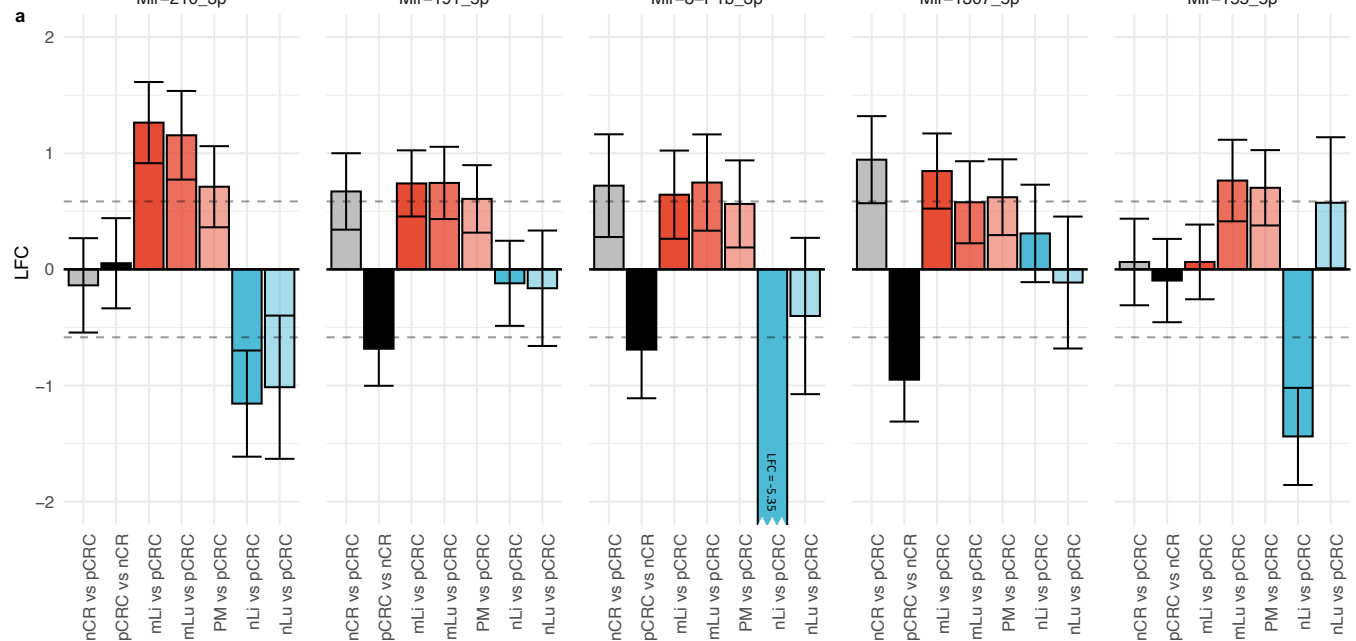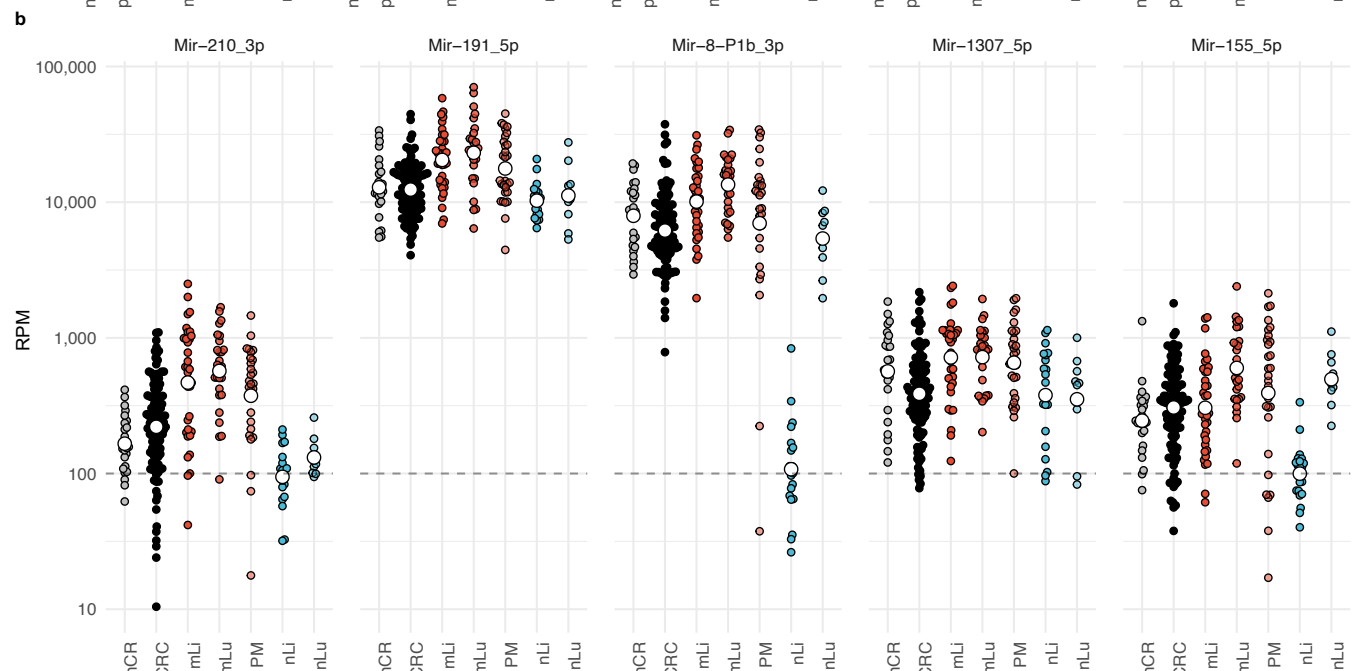

**Fig 4**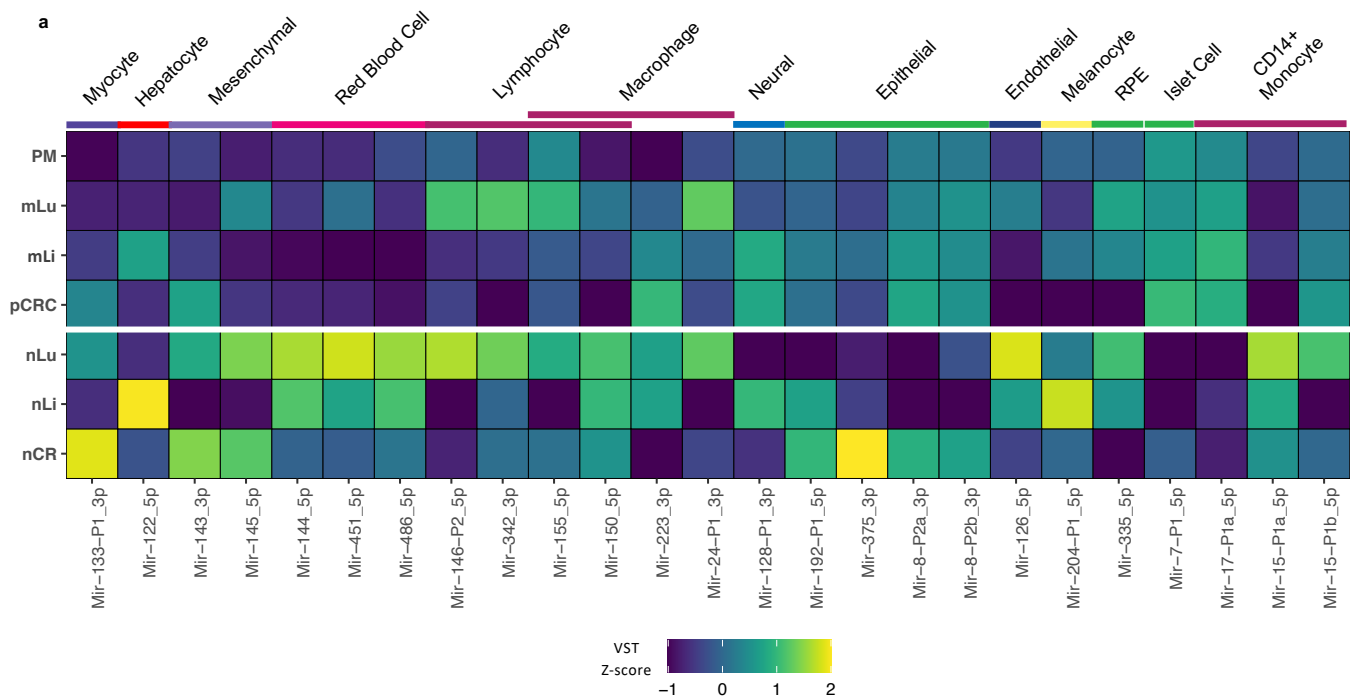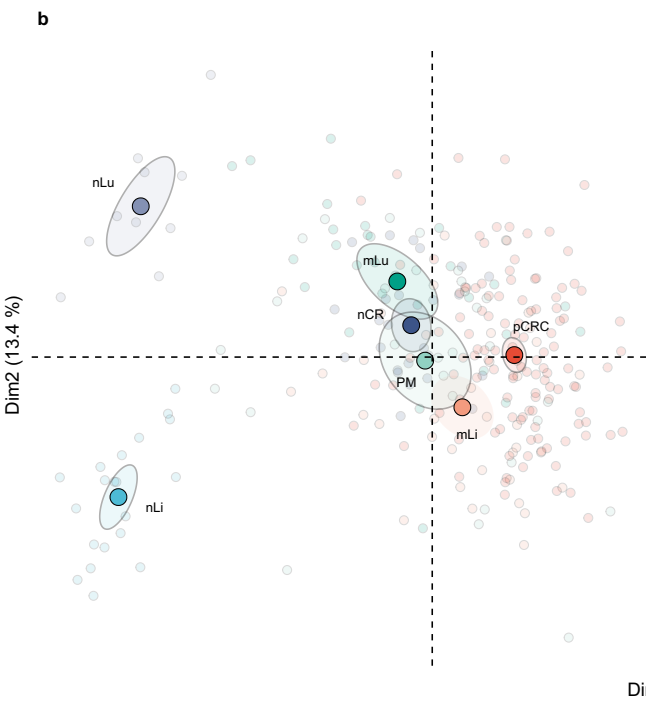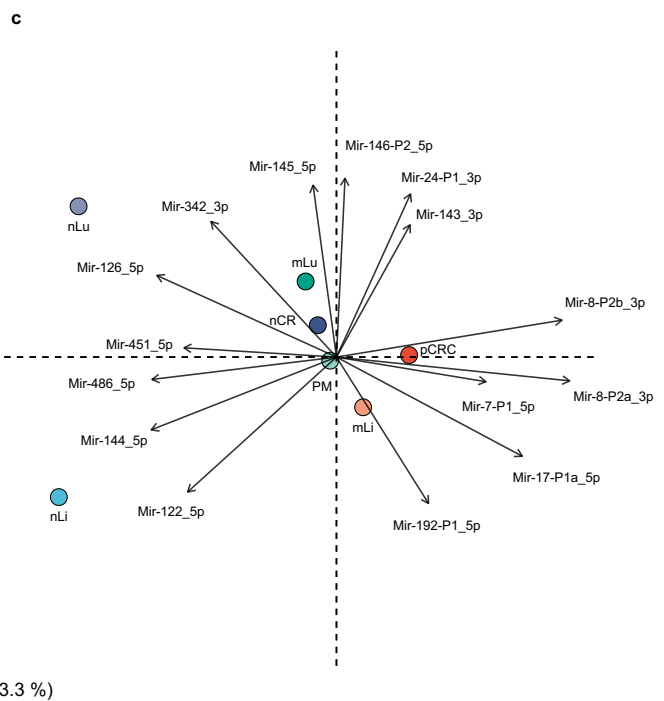

**Table 1 Differentially expressed miRNAs in mCRC compared to pCRC according to metastatic site**

| MirGeneDB ID ( <i>miRBase ID</i> )  | pCRC   | mLi vs pCRC |              |          | mLu vs pCRC |              |          | PM vs pCRC |              |          |
|-------------------------------------|--------|-------------|--------------|----------|-------------|--------------|----------|------------|--------------|----------|
|                                     | RPM    | RPM         | LFC (SE)     | FDR      | RPM         | LFC (SE)     | FDR      | RPM        | LFC (SE)     | FDR      |
| Mir-191_5p                          | 13 630 | 23 253      | 0.74 (0.15)  | 3.67E-06 | 26 989      | 0.74 (0.16)  | 9.81E-06 | 20 429     | 0.61 (0.15)  | 2.42E-04 |
| Mir-210_3p                          | 291    | 685         | 1.26 (0.18)  | 4.73E-11 | 693         | 1.15 (0.19)  | 1.55E-08 | 491        | 0.71 (0.18)  | 3.37E-04 |
| Mir-1307_5p                         | 492    | 887         | 0.85 (0.17)  | 2.99E-06 |             |              |          | 797        | 0.62 (0.17)  | 8.29E-04 |
| Mir-8-P1b_3p ( <i>mir-141-3p</i> )  | 7518   | 11 957      | 0.64 (0.19)  | 4.07E-03 | 15 111      | 0.75 (0.21)  | 1.12E-03 |            |              |          |
| Mir-155_5p                          | 387    |             |              |          | 733         | 0.76 (0.18)  | 7.24E-05 | 654        | 0.70 (0.17)  | 1.59E-04 |
| Mir-10-P1a_5p ( <i>mir-10a-5p</i> ) | 97 123 | 164 925     | 0.86 (0.19)  | 8.04E-05 |             |              |          |            |              |          |
| Mir-592_5p                          | 75     | 137         | 0.98 (0.27)  | 4.88E-03 |             |              |          |            |              |          |
| Mir-1247_5p                         | 69     | 127         | 0.85 (0.28)  | 2.58E-02 |             |              |          |            |              |          |
| Mir-425_5p                          | 700    | 1117        | 0.73 (0.12)  | 2.90E-08 |             |              |          |            |              |          |
| Mir-486_5p                          | 2013   | 1489        | -0.66 (0.23) | 3.47E-02 |             |              |          |            |              |          |
| Mir-142_5p                          | 3453   |             |              |          | 7117        | 0.84 (0.18)  | 2.01E-05 |            |              |          |
| Mir-19-P2a/P2b_3p                   | 1297   |             |              |          | 2345        | 0.80 (0.15)  | 9.38E-07 |            |              |          |
| Mir-374-P1_5p                       | 115    |             |              |          | 217         | 0.72 (0.12)  | 9.07E-09 |            |              |          |
| Mir-19-P1_3p                        | 379    |             |              |          | 597         | 0.65 (0.16)  | 3.42E-04 |            |              |          |
| Mir-423_5p                          | 433    |             |              |          | 202         | -1.17 (0.17) | 1.35E-10 |            |              |          |
| Let-7-P1b_5p                        | 1057   |             |              |          | 650         | -0.86 (0.16) | 2.55E-07 |            |              |          |
| Mir-197_3p                          | 181    |             |              |          | 113         | -0.74 (0.13) | 1.76E-07 |            |              |          |
| Mir-92-P1c_3p                       | 1398   |             |              |          | 981         | -0.72 (0.18) | 2.22E-04 |            |              |          |
| Mir-362-P2/P4_3p                    | 441    |             |              |          | 302         | -0.65 (0.14) | 2.36E-05 |            |              |          |
| Mir-221-P2_3p                       | 1633   |             |              |          | 1101        | -0.60 (0.14) | 8.50E-05 |            |              |          |
| Mir-506-P3_3p                       | 6      |             |              |          |             |              |          | 112        | 2.69 (0.29)  | 6.35E-09 |
| Mir-506 P4a1/P4a2/P4b_3p            | 14     |             |              |          |             |              |          | 191        | 2.72 (0.29)  | 5.75E-11 |
| Mir-154-P9_3p                       | 253    |             |              |          |             |              |          | 455        | 0.85 (0.14)  | 1.43E-08 |
| Mir-127_3p                          | 2263   |             |              |          |             |              |          | 2888       | 0.61 (0.20)  | 1.42E-02 |
| Mir-154-P36_3p                      | 195    |             |              |          |             |              |          | 330        | 0.74 (0.13)  | 7.13E-07 |
| Mir-223_3p                          | 619    |             |              |          |             |              |          | 280        | -0.94 (0.21) | 4.62E-05 |

Reads per million (RPM); log 2 fold change (LFC) estimated using DESeq2; standard error (SE); primary colorectal cancer (pCRC); normal colorectal tissue (nCR); CRC liver metastasis (mLi); normal adjacent liver tissue (nLi); CRC lung metastasis (mLu); normal adjacent lung tissue (nLu); CRC peritoneal metastasis (PM); false discovery rate (FDR)
